# Supplementary material for: Silicon-assisted propargylic transfer to aldehydes
Source: Royal Society of Chemistry journal article supplement (doi:10.1039/b411653d), 2004-01-01
Supplement: b411653d.pdf [file b411653d.pdf]

## Silicon-assisted Homopropargylic Transfer to Aldehydes

*Kiew-Ching Lee, Man-Jing Lin, Teck-Peng Loh\**

Department of Chemistry, National University of Singapore, 3 Science Drive 3, Singapore 117543, Singapore.

### Supporting Information

#### General

THF was distilled from sodium/benzophenone. Hexane and dichloromethane were distilled from CaH<sub>2</sub>. TLC was carried out with pre-coated Merck 60 F<sub>254</sub> plates. Silica gel 60 (Merck, 400-630 mesh) was used for column chromatography. Infrared spectra were recorded on a Bio-Rad FTS 165 FTIR spectrometer. Liquid samples were examined as film between NaCl salt plates. <sup>1</sup>H and <sup>13</sup>C NMR spectra were taken in CDCl<sub>3</sub> on Bruker DPX300 and Bruker AMX500 and referenced to internal tetramethylsilane (SiMe<sub>4</sub>). Chemical shifts for <sup>1</sup>H NMR spectra are reported as  $\delta$  in units of parts per million (ppm) downfield from SiMe<sub>4</sub> ( $\delta$  0.0) and relative to the signal of chloroform-d ( $\delta$  7.2600, singlet). Multiplicities were given as: s (singlet); brs (broad singlet); d (doublet); t (triplet); q (quartet); dd (doublets of doublet); dt (doublets of triplet); dtq (doublets of triplets of quartet); or m (multiplets). The number of protons (n) for a given resonance is indicated by nH. Coupling constants are reported as a J value in Hz. Carbon nuclear magnetic resonance spectra (<sup>13</sup>C NMR) are reported as  $\delta$  in units of parts per million (ppm) downfield from SiMe<sub>4</sub> ( $\delta$  0.0) and relative to the signal of chloroform-d ( $\delta$  77, triplet).

Mass spectral analyses were carried out on a VG 7035 micromass mass spectrophotometer at a source temperature of 200 °C and at an ion current of 70 eV. Mass spectral data were reported in units of mass to charge (m/z) and % intensity.

#### Experimental Section

##### **Crossover Reactions of Allenic Alcohols and Aldehydes in CH<sub>2</sub>Cl<sub>2</sub> with In(OTf)<sub>3</sub>; General Procedure:**

The mixture of cyclohexanecarboxyldehyde (89 mg, 0.8 mmol, 4 equiv) and 1-cyclohexyl-2-trimethylsilyl-but-2,3-dien-1-ol (45 mg, 0.2 mmol, 1 equiv) was added to a solution of indium triflate (1 mg, 0.002 mmol, 0.01 equiv) in 6 mL dried CH<sub>2</sub>Cl<sub>2</sub> at room temperature under an atmosphere of dry nitrogen. The mixture was stirred for 1 hour and finally quenched with saturated sodium bicarbonate. Purification through flash silica gel column chromatography provides 44.1 mg (98% yield) of 1-cyclohexyl-4-trimethylsilyl-but-3-yn-ol as a colourless oil.

### 1-Cyclohexyl-4-trimethylsilylbut-3-yn-1-ol (Table 3, entry 1)

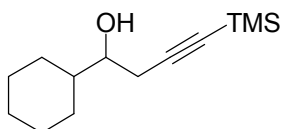

**Yield%:** 98%

**R<sub>f</sub>** 0.67 (hexane : ethyl acetate 4:1)

**<sup>1</sup>H NMR:** (300 MHz, CDCl<sub>3</sub>)

δ 3.46-3.41 (m, 1H, CHOH), 2.43 (dd, *J* = 3.6, 16.71 Hz, 1H, C≡CCHH), 2.32 (dd, *J* = 7.65, 16.71 Hz, 1H, C≡CCHH), 2.12 (br, 1H, CHOH), 1.86-0.96 (m, 11H, c-C<sub>6</sub>H<sub>11</sub>), 0.11 [s, 9H, Si(CH<sub>3</sub>)<sub>3</sub>] ppm

**<sup>13</sup>C NMR:** (125 MHz, CDCl<sub>3</sub>)

δ 103.7 (C≡CSi), 87.3 (C≡CSi), 73.8 (CHOH), 42.6 (CHCHOH), 28.9, 28.1, 26.3, 26.1, 26.0, 25.9 (CH<sub>2</sub>), -0.01 (Si(CH<sub>3</sub>)<sub>3</sub>) ppm

**FTIR:** 3402, 2928, 2851, 2663, 2174, 1713, 1450, 1422, 1349, 1249, 1198, 1103, 1086, 1015, 842, 760, 698, 651 cm<sup>-1</sup>

**EIHRMS:** Calcd for C<sub>13</sub>H<sub>24</sub>OSi : 224.1596, found : 224.1594.

### 1-Phenyl-6-trimethylsilylhex-5-yn-3-ol (Table 3, entry 2)

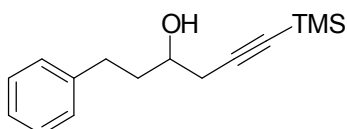

**Yield%:** 79%

**R<sub>f</sub>** 0.54 (hexane : ethyl acetate 4:1)

**<sup>1</sup>H NMR:** (500 MHz, CDCl<sub>3</sub>)

δ 7.31-7.26 (m, 2H, phenyl), 7.22-7.18 (m, 3H, phenyl), 3.76 (quintet, *J* = 6.45 Hz, 1H, CHOH), 2.81 (dt, *J* = 13.9, 7.35 Hz, 1H, PhCHH), 2.71 (dt, *J* = 13.9, 8.35 Hz, 1H, PhCHH), 2.48 (dd, *J* = 16.65, 5.1 Hz, 1H, C≡CCHH), 2.40 (dd, *J* = 6.95, 16.63 Hz, 1H, C≡CCHH), 2.09 (brs, 1H, CHOH), 1.86 (td, *J* = 8.35, 6.0 Hz, 2H, PhCH<sub>2</sub>CH<sub>2</sub>), 0.17 [s, 9H, Si(CH<sub>3</sub>)<sub>3</sub>] ppm

**<sup>13</sup>C NMR:** (125 MHz, CDCl<sub>3</sub>)

δ 141.7, 128.3, 125.8 (phenyl), 102.9 (C≡CSi), 87.7 (C≡CSi), 69.0 (CHOH), 37.7 (CH<sub>2</sub>CHOH), 31.8 (PhCH<sub>2</sub>), 28.9 (CH<sub>2</sub>C≡C), 0.03 (Si(CH<sub>3</sub>)<sub>3</sub>) ppm

**FTIR:** 3434, 3020, 2961, 2170, 1718, 1492, 1454, 1411, 1251, 1216, 1040, 845, 758, 700, 669 cm<sup>-1</sup>

**EIHRMS:** Calcd for C<sub>15</sub>H<sub>22</sub>OSi : 246.1440, found : 246.1396.

### 7-Benzyloxy-1-trimethylsilylanyl-hept-1-yn-4-ol (Table 3, entry 3)

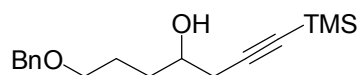

**Yield%:** 78%

**R<sub>f</sub>** 0.40 (hexane : ethyl acetate 4:1)

**<sup>1</sup>H NMR:** (500 MHz, CDCl<sub>3</sub>)

δ 7.19-7.29 (m, 5H, phenyl), 4.44 (s, 2H, PhCH<sub>2</sub>O), 3.70-3.66 (m, 1H, CHOH), 3.45 (t, *J* = 6 Hz, 2H, BnOCH<sub>2</sub>), 2.60 (brs, 1H, CHOH), 2.36 (dd, *J* = 5.55, 16.87 Hz, 1H, C≡CCHH), 2.32 (dd, *J* = 6.5, 16.65 Hz, 1H, C≡CCHH), 1.73-1.47 (m, 4H, BnOCH<sub>2</sub>(CH<sub>2</sub>)<sub>2</sub>), 0.09 (s, 9H, Si(CH<sub>3</sub>)<sub>3</sub>) ppm

**<sup>13</sup>C NMR:** (125 MHz, CDCl<sub>3</sub>)

δ 138.1, 128.3, 127.6, 127.5 (Phenyl), 103.4 (C≡CSi), 87.2 (C≡CSi), 72.9 (OCH<sub>2</sub>), 70.2 (OCH<sub>2</sub>), 69.7 (CHOH), 33.3 (CH<sub>2</sub>CHOH), 28.7 (CH<sub>2</sub>C≡C), 26.0 (BnOCH<sub>2</sub>CH<sub>2</sub>) 0.04 (Si(CH<sub>3</sub>)<sub>3</sub>) ppm

**FTIR:** 3409, 3088, 3064, 3031, 2957, 2929, 2902, 2859, 2174, 1605, 1454, 1362, 1249, 1096, 843, 734 cm<sup>-1</sup>

**EIHRMS:** Calcd for C<sub>17</sub>H<sub>26</sub>O<sub>2</sub>Si : 290.1702, found : 290.1701.

### 1-Trimethylsilylanyl-dodec-1-yn-4-ol (Table 3, entry 4)

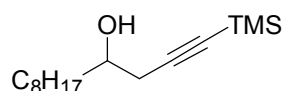

**Yield%:** 77%

**R<sub>f</sub>** 0.68 (hexane : ethyl acetate 4:1)

**<sup>1</sup>H NMR:** (300 MHz, CDCl<sub>3</sub>)

δ 3.71 (quintet, *J* = 5.55 Hz, 1H, CHOH), 2.45 (dd, *J* = 4.89, 16.71 Hz, 1H, C≡CCHH), 2.33 (dd, *J* = 6.96, 16.71 Hz, 1H, C≡CCHH), 1.96 (brs, 1H, CHOH), 1.52-1.48 (m, 2H, CH<sub>2</sub>CHOH), 1.27 [m, 12H, (CH<sub>2</sub>)<sub>6</sub>], 0.87 (t, *J* = 5.9 Hz, 3H, CH<sub>3</sub>), 0.15 [s, 9H, Si(CH<sub>3</sub>)<sub>3</sub>] ppm

**<sup>13</sup>C NMR:** (75 MHz, CDCl<sub>3</sub>)

δ 103.4 (C≡CSi), 86.9 (C≡CSi), 70.0 (CHOH), 36.2 (CH<sub>2</sub>CHOH), 31.9, 29.5, 29.3, 28.9, 25.6, 22.7 [(CH<sub>2</sub>)<sub>6</sub>CH<sub>3</sub>], 14.1 (CH<sub>3</sub>), 0.07 [Si(CH<sub>3</sub>)<sub>3</sub>] ppm

**FTIR:** 3365, 2957, 2926, 2855, 2176, 1465, 1250, 1084, 1005, 842, 760, 698, 648 cm<sup>-1</sup>

**EIHRMS:** Calcd for C<sub>15</sub>H<sub>30</sub>OSi : 254.2066, found : 254.2067.

**1-trimethylsilyl-1-dec-7-en-1-yn-4-ol (Table 3, entry 5)**

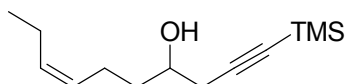

**Yield%:** 77%

**R<sub>f</sub>** 0.64 (hexane : ethyl acetate 4:1)

**<sup>1</sup>H NMR:** (500 MHz, CDCl<sub>3</sub>)

δ 5.39 (m, 1H, HC=CH), 5.32 (m, 1H, HC=CH), 3.74 (quintet, *J* = 6 Hz, 1H, CHOH), 2.45 (dd, *J* = 4.65, 16.65 Hz, 1H, C≡CCHH), 2.35 (dd, *J* = 6.5, 16.87 Hz, 1H, C≡CCHH), 2.19-2.10 (m, 2H, C=CCH<sub>2</sub>CH<sub>3</sub>), 2.08-2.02 (m, 2H, C=CCH<sub>2</sub>CH<sub>2</sub>), 2.00 (brs, 1H, CHOH), 1.58 (td, *J* = 7.62, 6.5 Hz, 2H, CH<sub>2</sub>CHOH), 0.96 (t, *J* = 7.65 Hz, 3H, CH<sub>2</sub>CH<sub>3</sub>), 0.15 (s, 9H, Si(CH<sub>3</sub>)<sub>3</sub>) ppm

**<sup>13</sup>C NMR:** (125 MHz, CDCl<sub>3</sub>)

δ 132.4 (HC=CH), 128.1 (HC=CH), 103.1 (C≡CSi), 87.6 (C≡CSi), 69.4 (CHOH), 36.1 (CH<sub>2</sub>), 28.8 (CH<sub>2</sub>C≡C), 23.3 (CH<sub>2</sub>), 20.4 (CH<sub>2</sub>), 14.2 (CH<sub>2</sub>CH<sub>3</sub>), 0.03 (Si(CH<sub>3</sub>)<sub>3</sub>) ppm

**FTIR:** 3392, 3007, 2962, 2933, 2875, 2856, 2176, 1654, 1453, 1249, 1067, 1033, 842, 760 cm<sup>-1</sup>

**EIHRMS:** Calcd for C<sub>13</sub>H<sub>24</sub>OSi : 224.1596, found : 246.1600.

**1-Benzyloxy-6-trimethylsilyl-1-hex-5-yn-3-ol (Table 3, entry 6)**

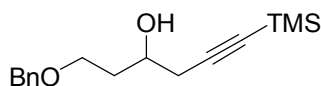

**Yield%:** 73%

**R<sub>f</sub>** 0.46 (hexane : ethyl acetate 4:1)

**<sup>1</sup>H NMR:** (500 MHz, CDCl<sub>3</sub>)

δ 7.30-7.27 (m, 5H, phenyl), 4.52 (s, 2H, PhCH<sub>2</sub>O), 3.96 (tq, *J* = 9.03, 3.25 Hz, 1H, CHOH), 3.73 (ddd, *J* = 9.49, 7.88, 4.6 Hz, 1H, BnOCHH), 3.65 (ddd, *J* = 10.88, 7.65, 4.65 Hz, 1H, BnOCHH), 2.46 (dd, *J* = 6.05, 17.35 Hz, 1H, C≡CCHH), 2.41 (dd, *J* = 6.45, 16.85 Hz, 1H, C≡CCHH), 1.92 (dddd, *J* = 14.32, 6.48, 4.63, 3.25 Hz, 1H, BnOCH<sub>2</sub>CHH), 1.86-1.79 (m, 1H, BnOCH<sub>2</sub>CHH), 0.15 (s, 9H, Si(CH<sub>3</sub>)<sub>3</sub>) ppm

**<sup>13</sup>C NMR:** (125 MHz, CDCl<sub>3</sub>)

δ 137.8, 128.4, 127.7, 127.6 (Phenyl), 103.3 (C≡CSi), 87.0 (C≡CSi), 73.2 (OCH<sub>2</sub>), 69.3 (CHOH), 68.4 (OCH<sub>2</sub>), 35.3 (CH<sub>2</sub>CHOH), 28.5 (CH<sub>2</sub>C≡C), 0.04 (Si(CH<sub>3</sub>)<sub>3</sub>) ppm

**FTIR:** 3430, 3089, 3065, 3032, 2958, 2926, 2900, 2863, 2175, 1632, 1454, 1249, 1098, 843, 735  $\text{cm}^{-1}$

**EIHRMS:** Calcd for  $\text{C}_{16}\text{H}_{23}\text{O}_2\text{Si}$  ( $\text{M}^+$ ) : 275.1473, found : 275.1466.

### 6-methyl-1-trimethylsilylanyl-hept-1-yn-4-ol (Table 3, entry 7)

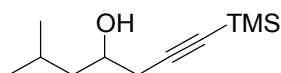

**Yield%:** 73%

**R<sub>f</sub>** 0.61 (hexane : ethyl acetate 4:1)

**<sup>1</sup>H NMR:** (500 MHz,  $\text{CDCl}_3$ )

$\delta$  3.80 (m, 1H,  $\text{CHOH}$ ), 2.43 (dd,  $J = 4.65, 16.62$  Hz, 1H,  $\text{C}\equiv\text{CCHH}$ ), 2.32 (dd,  $J = 6.95, 16.62$  Hz, 1H,  $\text{C}\equiv\text{CCHH}$ ), 1.77 (m, 1H,  $\text{CH}(\text{CH}_3)_2$ ), 1.45 (ddd,  $J = 8.66, 8.88, 13.99$  Hz, 1H,  $(\text{CH}_3)_2\text{CHCHH}$ ), 1.29 (ddd,  $J = 8.55, 8.88, 14.4$  Hz, 1H,  $(\text{CH}_3)_2\text{CHCHH}$ ), 0.91 (q,  $J = 3.45$  Hz, 6H,  $\text{CH}(\text{CH}_3)_2$ ), 0.15 (s, 9H,  $\text{Si}(\text{CH}_3)_3$ ) ppm

**<sup>13</sup>C NMR:** (125 MHz,  $\text{CDCl}_3$ )

$\delta$  103.3 ( $\text{C}\equiv\text{CSi}$ ), 87.6 ( $\text{C}\equiv\text{CSi}$ ), 68.0 ( $\text{CHOH}$ ), 45.4 [ $(\text{CH}_3)_2\text{CHCH}_2$ ], 29.3 ( $\text{CH}_2\text{C}\equiv\text{C}$ ), 24.6 [ $\text{CH}(\text{CH}_3)_2$ ], 23.25, ( $\text{CHCH}_3$ ), 22.1 ( $\text{CHCH}_3$ ) 0.05 ( $\text{Si}(\text{CH}_3)_3$ ) ppm

**FTIR:** 3401, 2958, 2929, 2871, 2176, 1641, 1467, 1368, 1250, 1014, 842, 760 647  $\text{cm}^{-1}$

**EIHRMS:** Calcd for  $\text{C}_{11}\text{H}_{22}\text{OSi}$  : 198.1440, found : 198.1397.

### 1-Trimethylsilylanyl-non-1-yn-4-ol (Table 3, entry 8)

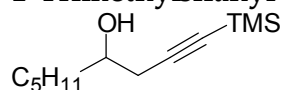

**Yield:** 71%.

**R<sub>f</sub>** 0.64 (Hexane : Ethyl Acetate = 4:1)

**<sup>1</sup>H NMR** (500 MHz,  $\text{CDCl}_3$ ):

$\delta$  3.72 (quintet,  $J = 6.45$  Hz, 1H,  $\text{CHOH}$ ), 2.44 (dd,  $J = 4.60, 16.87$  Hz, 1H,  $\text{C}\equiv\text{CCHH}$ ), 2.44 (dd,  $J = 6.95, 16.62$  Hz, 1H,  $\text{C}\equiv\text{CCHH}$ ), 1.53-1.49 (m, 2H,  $\text{CH}_2$ ), 1.33-1.27 (m, 6H,  $(\text{CH}_2)_3$ ), 0.87 (t,  $J = 6.95$  Hz, 3H,  $\text{CH}_3$ ), 0.15 (s, 9H,  $\text{Si}(\text{CH}_3)_3$ ) ppm

**<sup>13</sup>C NMR** (125 MHz,  $\text{CDCl}_3$ ):

$\delta$  103.3 ( $\text{C}\equiv\text{CSi}$ ), 87.5 ( $\text{C}\equiv\text{CSi}$ ), 69.9 ( $\text{CHOH}$ ), 36.2 ( $\text{CH}_2\text{CHOH}$ ), 31.7, 28.8, 25.2, 22.5 ( $(\text{CH}_2)_4\text{CH}_3$ ), 13.9 ( $(\text{CH}_2)_4\text{CH}_3$ ), 0.04 ( $\text{Si}(\text{CH}_3)_3$ ) ppm

**FTIR:** 3394, 2958, 2932, 2873, 2859, 2176, 1421, 1249, 1020, 840, 760  $\text{cm}^{-1}$

**EIHRMS:** Calcd for  $\text{C}_{12}\text{H}_{24}\text{OSi}$  : 212.1596, found : 212.1596.

**8-Allyloxy-1-trimethylsilanyl-oct-1-yn-4-ol (Table 3, entry 9)**

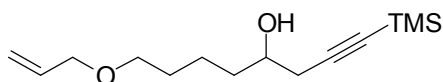

**Yield%:** 70%

**R<sub>f</sub>** 0.42 (hexane : ethyl acetate 4:1)

**<sup>1</sup>H NMR: (500 MHz, CDCl<sub>3</sub>)**

δ 5.89 (tdd, *J* = 11.47, 10.53, 5.55 Hz, 1H, CH=CH<sub>2</sub>), 5.25 (ddt, *J* = 9.71, 3.25, 1.85 Hz, 1H, CH=CHH), 5.15 (ddt, *J* = 10.27, 3, 1.4 Hz, 1H, CH=CHH), 3.95 (dt, *J* = 6, 1.4 Hz, 2H, CH<sub>2</sub>=CHCH<sub>2</sub>O), 3.72 (quintet, *J* = 6 Hz, 1H, CHOH), 3.42 (t, *J* = 6.5 Hz, 2H, AllyOCH<sub>2</sub>), 2.44 (dd, *J* = 5.1, 16.62 Hz, 1H, C≡CCHH), 2.34 (dd, *J* = 6.95, 16.62 Hz, 1H, C≡CCHH), 2.07 (brs, 1H, CHOH), 1.37-1.66 (m, 6H, AllyOCH<sub>2</sub>(CH<sub>2</sub>)<sub>3</sub>), 0.14 (s, 9H, Si(CH<sub>3</sub>)<sub>3</sub>) ppm

**<sup>13</sup>C NMR: (125 MHz, CDCl<sub>3</sub>)**

δ 134.9 (CH=CH<sub>2</sub>), 116.7 (CH=CH<sub>2</sub>), 103.2 (C≡CSi), 87.5 (C≡CSi), 71.8 (OCH<sub>2</sub>), 70.1 (OCH<sub>2</sub>), 69.7 (CHOH), 35.9 (CH<sub>2</sub>CHOH), 29.5 (CH<sub>2</sub>), 28.8 (CH<sub>2</sub>C≡C), 22.2 (CH<sub>2</sub>) 0.03 (Si(CH<sub>3</sub>)<sub>3</sub>) ppm

**FTIR:** 3427, 3081, 2939, 2863, 2175, 1420, 1347, 1249, 1103, 1010, 922, 843, 760 cm<sup>-1</sup>

**ESIHRMS:** Calcd for C<sub>14</sub>H<sub>26</sub>O<sub>2</sub>SiNa : 277.1600, found : 277.1599.

**Chiral resolution** of **1** was carried out with *S*-(+)- $\alpha$ -acetoxyphenylacetic acid followed by hydrolysis. For the standard procedure, refer to Whitesell, J.K.; Reynolds, D. *J. Org. Chem.* **1983**, *48*, 3548. (Note: the separation of the *S*-(+)- $\alpha$ -acetoxyphenylacetic-ester of **1** was done by silica gel column chromatography with Hexane:Acetone = 250:0.5 as mobile phase).

Enantiomeric excess for (-)-1-cyclohexyl-2-trimethylsilanyl-buta-2,3-dien-1-ol was 92 % by NMR (500 MHz, CDCl<sub>3</sub>) analysis.

The configurations were determined based on literature:

Brown, H.C.; Khire, U.R.; Narla, G. *J. Org. Chem.* **1995**, *60*, 8130-8131.

Compain, P.; Gorè, J.; Vatèle, J.M. *Tetrahedron* **1996**, *52*(31), 10405-10416.

**(*R*)-1-Cyclohexyl-2-trimethylsilanyl-buta-2,3-dien-1-ol (**1**)**

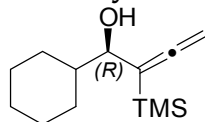

**Selectivity:** 92 % *ee*

**Opt. Rot.:** [ $\alpha$ ]<sub>D</sub><sup>25</sup> -16.95 (c = 7.8 in CHCl<sub>3</sub>)

**R<sub>f</sub>** 0.75 (hexane : ethyl acetate 4:1)

**<sup>1</sup>H NMR:** (500 MHz, CDCl<sub>3</sub>)

δ 4.54 (dd, *J* = 2.3, 11.08 Hz, 1H, C=C=CHH), 4.50 (dd, *J* = 2.3, 11.1 Hz, 1H, C=C=CHH), 3.91 (m, 1H, CHOH), 1.85-0.96 (m, 11H, c-C<sub>6</sub>H<sub>11</sub>), 0.14 [s, 9H, Si(CH<sub>3</sub>)<sub>3</sub>] ppm

**<sup>13</sup>C NMR:** (125 MHz, CDCl<sub>3</sub>)

δ 207.5 (C=C=CH<sub>2</sub>), 99.5 (C=C=CH<sub>2</sub>), 75.1 (CHOH), 71.5 (C=C=CH<sub>2</sub>), 43.6 (CHCHOH), 30.4, 26.8, 26.4, 26.3, 26.0 (CH<sub>2</sub>), -0.8 [Si(CH<sub>3</sub>)<sub>3</sub>] ppm

**FTIR:** 3436, 2929, 2855, 1925, 1716, 1666, 1449, 1250, 1019, 843 757 cm<sup>-1</sup>.

**EIHRMS:** Calcd for C<sub>13</sub>H<sub>24</sub>OSi : 224.1596, found : 224.1592.

### (*R*)-Cyclohexyl-4-trimethylsilylbut-3-yn-1-ol (Table 4, entry 1)

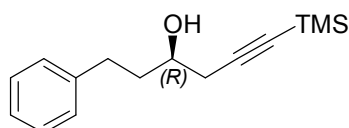

**Selectivity:** 84 % *ee*

**Opt. Rot.:** [α]<sub>D</sub><sup>25</sup> +15.8 (*c* = 0.9 in CHCl<sub>3</sub>)

HPLC analysis employing a Daicel Chiracel OD column

(Hexane: *i*-propanol 99:1, 0.3 mL/min: *t*<sub>1</sub> = 14.08 *t*<sub>2</sub> = 19.72.

**<sup>1</sup>H NMR:** (500 MHz, CDCl<sub>3</sub>)

δ 7.30-7.27 (m, 2H, phenyl), 7.21-7.17 (m, 3H, phenyl), 3.75 (quintet, *J* = 6.0 Hz, 1H, CHOH), 2.81 (dt, *J* = 13.4, 7.85 Hz, 1H, PhCHH), 2.70 (dt, *J* = 13.85, 8.35 Hz, 1H, PhCHH), 2.48 (dd, *J* = 16.62, 4.65 Hz, 1H, C≡CCHH), 2.38 (dd, *J* = 16.65, 6.05 Hz, 1H, C≡CCHH), 1.98 (brs, 1H, CHOH), 1.85 (td, *J* = 7.7, 6.5 Hz, 2H, PhCH<sub>2</sub>CH<sub>2</sub>), 0.16 [s, 9H, Si(CH<sub>3</sub>)<sub>3</sub>] ppm

**<sup>13</sup>C NMR:** (125 MHz, CDCl<sub>3</sub>)

δ 141.7, 128.4, 125.8 (phenyl), 102.9 (C≡CSi), 87.8 (C≡CSi), 69.0 (CHOH), 37.7 (CH<sub>2</sub>CHOH), 31.8 (PhCH<sub>2</sub>), 28.9 (CH<sub>2</sub>C≡C), 0.05 (Si(CH<sub>3</sub>)<sub>3</sub>) ppm

**FTIR:** 3434, 3020, 2961, 2170, 1718, 1492, 1454, 1411, 1251, 1216, 1040, 845, 758, 700, 669 cm<sup>-1</sup>

**EIHRMS:** Calcd for C<sub>15</sub>H<sub>22</sub>OSi : 246.1440, found : 246.1396.

### (*R*)-Phenyl-4-trimethylsilylbut-3-yn-1-ol (Table 4, entry 2)

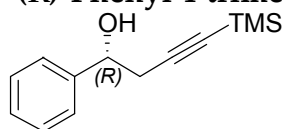

**Yield:** 44%.

**Selectivity:** 89 % *ee*

**Opt. Rot.:** [α]<sub>D</sub><sup>25</sup> +43.6 (*c* = 0.5 in CHCl<sub>3</sub>)

HPLC analysis employing a Daicel Chiracel OD-H column

(Hexane: *i*-propanol 99:1, 1 mL/min:  $t_1 = 10.67$   $t_2 = 14.00$ .)

**R<sub>f</sub>**: 0.51 (Hexane : Ethyl Acetate = 4:1)

**<sup>1</sup>H NMR** (300 MHz, CDCl<sub>3</sub>):

$\delta$  7.38-7.26 (m, 5H, phenyl), 4.84 (t,  $J = 6.27$  Hz, 1H, PhCHOH), 2.65 (d,  $J = 6.27$  Hz, 2H, CH<sub>2</sub>C≡CSi), 2.45 (brd, 1H, CHOH), 0.17 (s, 9H, Si(CH<sub>3</sub>)<sub>3</sub>) ppm

**<sup>13</sup>C NMR** (75 MHz, CDCl<sub>3</sub>):

$\delta$  142.5, 128.9, 127.8, 125.7, 103.0, 87.8 (CH<sub>2</sub>C≡CSi), 72.3 (CHOH), 31.0 (CHCH<sub>2</sub>C), 0.06 (Si(CH<sub>3</sub>)<sub>3</sub>) ppm

**FTIR**: 3396, 3033, 2960, 2902, 2177, 1724, 1604, 1494, 1454, 1250, 1202, 1039, 846, 759, 700 cm<sup>-1</sup>

**EIHRMS**: Calcd for C<sub>13</sub>H<sub>18</sub>OSi : 218.1127, found: 218.1125.

### (*R*)-Benzyloxy-6-trimethylsilylanyl-hex-5-yn-3-ol (Table 4, entry 3)

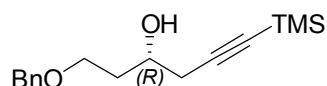

**R<sub>f</sub>** 0.46 (hexane : ethyl acetate 4:1)

**Selectivity**: 81 % *ee*

**Opt. Rot.**:  $[\alpha]_D^{26} +13$  ( $c = 0.05$  in CHCl<sub>3</sub>)

HPLC analysis employing a Daicel Chiracel OD-H column

(Hexane: *i*-propanol 99:1, 0.3 mL/min:  $t_1 = 27.64$   $t_2 = 30.71$ .)

**<sup>1</sup>H NMR**: (500 MHz, CDCl<sub>3</sub>)

$\delta$  7.30-7.27 (m, 5H, phenyl), 4.52 (s, 2H, PhCH<sub>2</sub>O), 3.96 (tq,  $J = 9.03, 3.25$  Hz, 1H, CHOH), 3.73 (ddd,  $J = 9.49, 7.88, 4.6$  Hz, 1H, BnOCHH), 3.65 (ddd,  $J = 10.88, 7.65, 4.65$  Hz, 1H, BnOCHH), 2.46 (dd,  $J = 6.05, 17.35$  Hz, 1H, C≡CCHH), 2.41 (dd,  $J = 6.45, 16.85$  Hz, 1H, C≡CCHH), 1.92 (dddd,  $J = 14.32, 6.48, 4.63, 3.25$  Hz, 1H, BnOCH<sub>2</sub>CHH), 1.86-1.79 (m, 1H, BnOCH<sub>2</sub>CHH), 0.15 (s, 9H, Si(CH<sub>3</sub>)<sub>3</sub>) ppm

**<sup>13</sup>C NMR**: (125 MHz, CDCl<sub>3</sub>)

$\delta$  137.8, 128.4, 127.7, 127.6 (Phenyl), 103.3 (C≡CSi), 87.0 (C≡CSi), 73.2 (OCH<sub>2</sub>) 69.3 (CHOH), 68.4 (OCH<sub>2</sub>), 35.3 (CH<sub>2</sub>CHOH), 28.5 (CH<sub>2</sub>C≡C), 0.04 (Si(CH<sub>3</sub>)<sub>3</sub>) ppm

**FTIR**: 3430, 3089, 3065, 3032, 2958, 2926, 2900, 2863, 2175, 1632, 1454, 1249, 1098, 843, 735 cm<sup>-1</sup>

**EIHRMS**: Calcd for C<sub>16</sub>H<sub>24</sub>O<sub>2</sub>Si : 276.1546, found : 276.1506.
